# Supplementary material for: Ternary crystal structure of human RORγ ligand-binding-domain, an inhibitor and corepressor peptide provides a new insight into corepressor interaction
Source: PubMed Central journal article supplement (PMC6255837; doi:10.1038/s41598-018-35783-9), 2018-11-26
Supplement: 41598_2018_35783_MOESM1_ESM.pdf [file 41598_2018_35783_MOESM1_ESM.pdf]

## Supplementary information

### **Ternary crystal structure of human ROR $\gamma$ ligand-binding-domain, an inhibitor and corepressor peptide provides a new insight into corepressor interaction**

#### Authors:

Masato Noguchi<sup>1\*</sup>, Akihiro Nomura<sup>1</sup>, Satoki Doi<sup>1</sup>, Keishi Yamaguchi<sup>1</sup>, Kazuyuki Hirata<sup>2</sup>, Makoto Shiozaki<sup>2</sup>, Katsuya Maeda<sup>2</sup>, Shintaro Hirashima<sup>2</sup>, Masayuki Kotoku<sup>2</sup>, Takayuki Yamaguchi<sup>3</sup>, Yoshiaki Katsuda<sup>3</sup>, Paul Crowe<sup>4</sup>, Haiyan Tao<sup>4</sup>, Scott Thacher<sup>4</sup> and Tsuyoshi Adachi<sup>1\*</sup>

#### Affiliations:

<sup>1</sup> Pharmaceutical Frontier Research Laboratories, Central Pharmaceutical Research Institute, Japan Tobacco Inc., 1-13-2, Fukuura, Kanazawa-Ku, Yokohama Kanagawa, 236-0004, Japan

<sup>2</sup> Chemical Research Laboratories, Central Pharmaceutical Research Institute, Japan Tobacco Inc., 1-1, Murasaki-cho, Takatsuki Osaka, 569-1125, Japan

<sup>3</sup> Biological Pharmacological Research Laboratories, Central Pharmaceutical Research Institute, Japan Tobacco Inc., 1-1, Murasaki-cho, Takatsuki Osaka, 569-1125, Japan

<sup>4</sup> Orphagen Pharmaceuticals, 11558 Sorrento Valley Road, Suite 4, San Diego, California, 92121, United States

\*Correspondence should be addressed to M.N. (masato.noguchi@jt.com) or T.A. (tsuyoshi.adachi@jt.com)

Masato Noguchi and Akihiro Nomura contributed equally to this work.

## Supplementary Figures

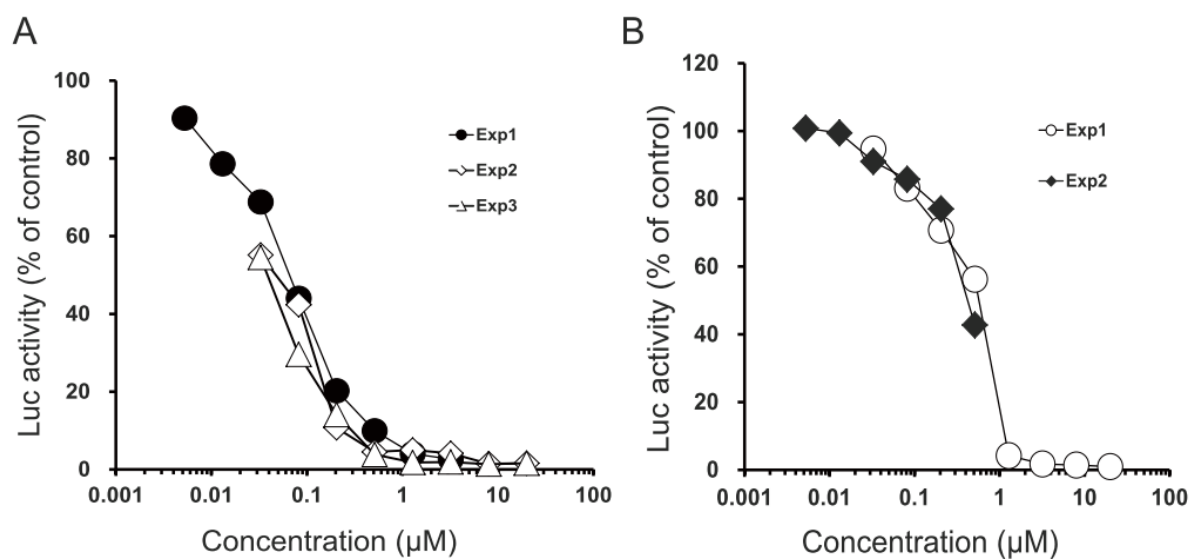

**Figure S1.** Inverse agonist activities in LUC reporter assay.

(A) Three independent experiments of inhibitory activity of compound A are overlaid.

(B) Two independent experiments of inhibitory activity of compound T are overlaid.

High-reproducibility was observed in LUC assay system.

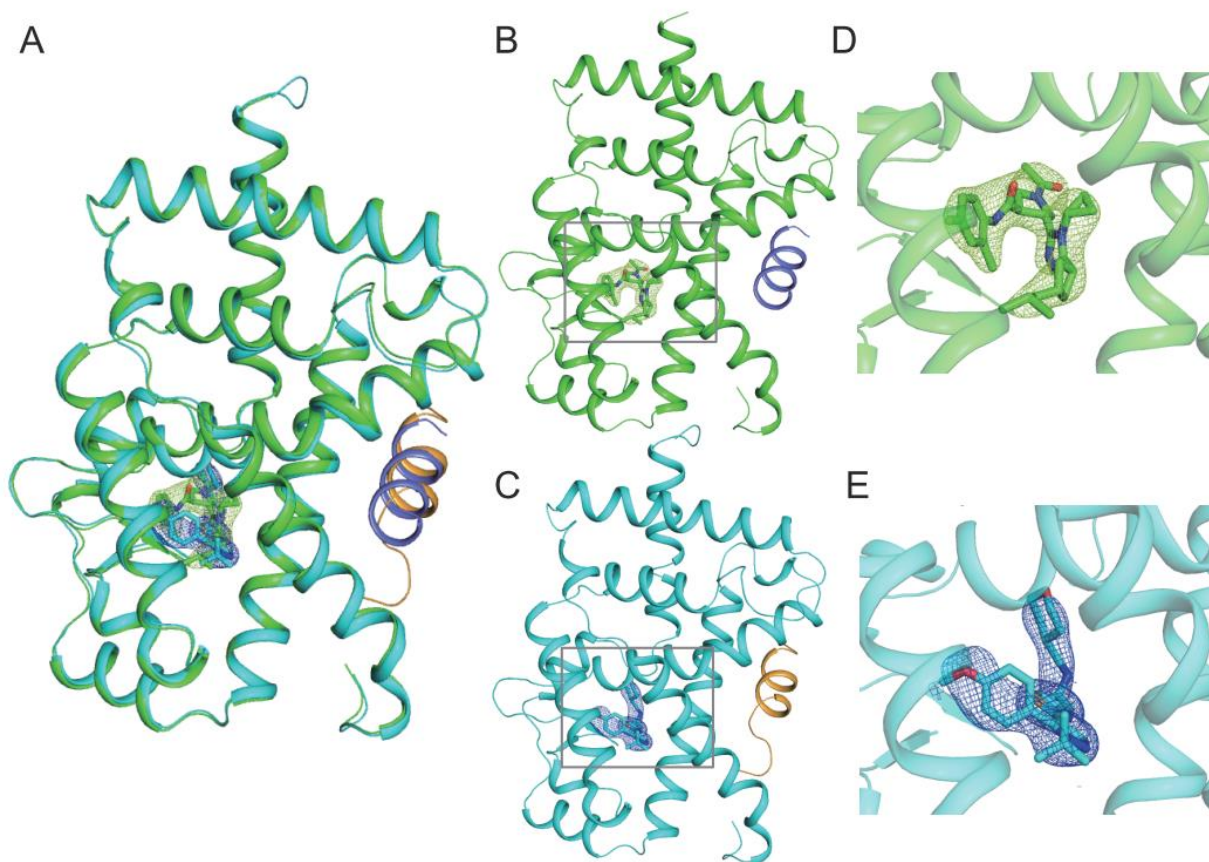

**Figure S2.** The ternary complexes of the ROR $\gamma$ -LBD containing compounds and SMRT22 corepressor (CoR) peptide.

(A) Superimposition of the ternary complex ROR $\gamma$ -LBD/compound A/CoR peptide (ROR $\gamma$  in *green*, CoR in *blue*) to that of ROR $\gamma$ -LBD/compound T/CoR peptide (ROR $\gamma$  in *cyan*, CoR in *camel*). Electron density maps (*mFo-DFc*) of compounds are shown at  $1\sigma$ .

(B)(C) Ternary complexes of ROR $\gamma$ -LBD/compound A/CoR peptide and ROR $\gamma$ -LBD /compound T/CoR peptide, respectively.

(D)(E) Close up views of squares in panel B and C, respectively.
